# Supplementary material for: Janus long-chain hyperbranched copolymers of PSt and POEGMA from a self-assembly mediated click reaction
Source: Royal Society of Chemistry journal article supplement (doi:10.1039/c6py00060f), 2016-01-01
Supplement: c6py00060f1.pdf [file c6py00060f1.pdf]

## Janus Long-Chain Hyperbranched Copolymer of PSt and POEGMA from Self-Assembly Mediated Click Reaction

Sheng-Qi Chen,<sup>#</sup> Chen He,<sup>#</sup> Hui-Juan Li, Peng-Yun Li, Wei-Dong He\*

*CAS Key Laboratory of Soft Matter Chemistry, Department of Polymer Science and  
Engineering, University of Science and Technology of China, Hefei, Anhui 230026,  
China*

### Synthesis of alkynyl-(PSt-N<sub>3</sub>)<sub>2</sub> and alkynyl-(POEGMA-N<sub>3</sub>)<sub>2</sub>

Figure S1 shows <sup>1</sup>H-NMR spectrum of alkynyl-(PSt-N<sub>3</sub>)<sub>2</sub>. Two meso-protons of phenyl groups of styrene units have the signal in the range of 6.3~6.9 ppm. The signals of methylene protons and methine proton of PSt backbone are located in the range of 1.0~2.3 ppm. Importantly, the signal of methylene protons from propargyl group appears at 4.52 ppm and that of methine proton next bromo end-group at 3.94 ppm.

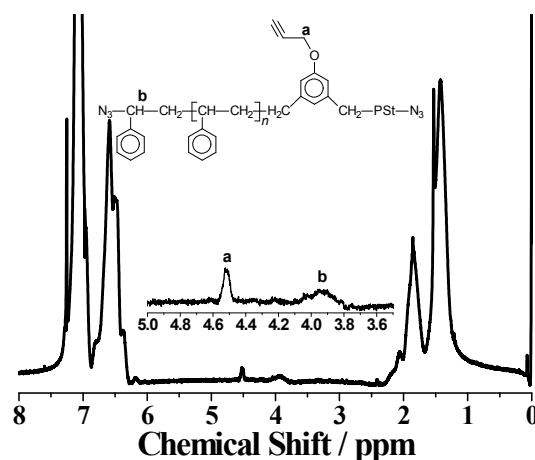

**Figure S1.**  $^1\text{H-NMR}$  spectrum of alkynyl-(PSt- $\text{N}_3$ ) $_2$  seesaw macromonomer

POEGMA with one alkynyl group at the chain center and two azido groups at each chain end [alkynyl-(POEGMA-Br) $_2$ ] was prepared through atom transfer radical polymerization (ATRP) of OEGMA with PBMPMP as the initiator and the conversion of bromo end groups into azido end groups. Figure S2 shows  $^1\text{H-NMR}$  spectrum of alkynyl-(POEGMA- $\text{N}_3$ ) $_2$ . Based on the integral heights of the signal at 3.67 ppm (methylene protons from OEG) and that at 4.25 ppm (methylene protons from propargyl group), real number-averaged molecular weight ( $M_{n,\text{NMR}}$ ) of alkynyl-(POEGMA- $\text{N}_3$ ) $_2$  is 15000.

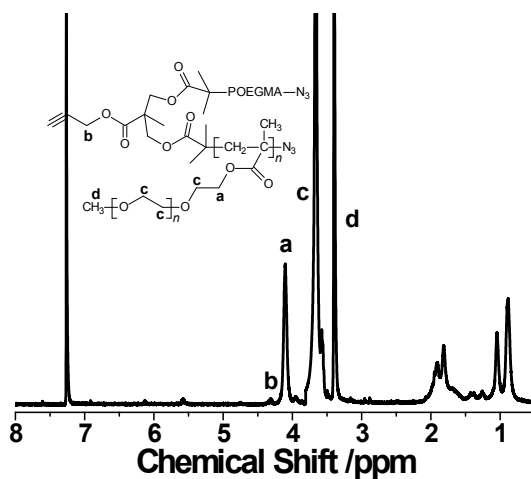

**Figure S2.**  $^1\text{H-NMR}$  spectrum of alkynyl-(POEGMA- $\text{N}_3$ ) $_2$  seesaw macromonomer

### Contact angle imaging of different copolymer films

Different  $\mu$ -(PSt- $\text{N}_3$ ) $_2$ (POEGMA- $\text{N}_3$ ) $_2$  films were obtained by casting real solution in THF and micelle dispersion in one selective solvent. Contact angles to water ( $CA_w$ ) and oil ( $CA_o$ ) were imaged with digital camera, as shown in Figure S3.

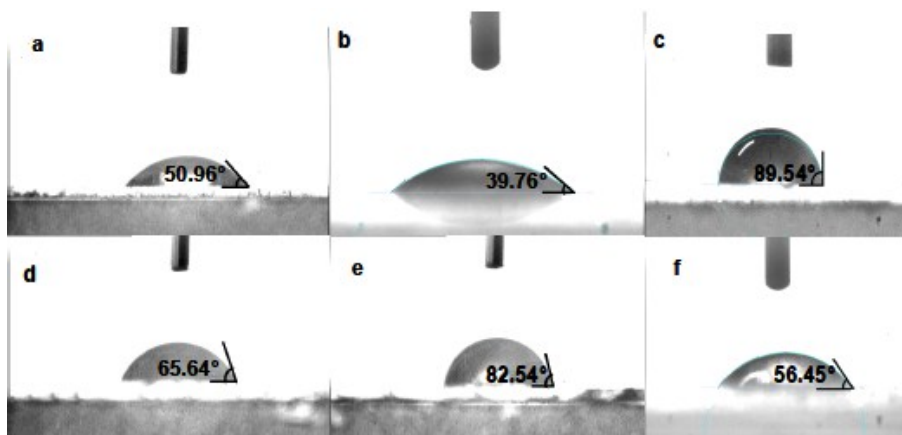

**Figure S3.** Contact angles of  $\mu$ -(PSt-N<sub>3</sub>)<sub>2</sub>(POEGMA-N<sub>3</sub>)<sub>2</sub> films casting from different solvents [ $CA_w$ : THF (a), methanol (b), cyclohexane (c);  $CA_o$ : THF (d), methanol (e), cyclohexane (f)]

Camera images of different  $\mu$ -(*lhb*-POEGMA)(PSt-N<sub>3</sub>)<sub>2</sub> films are shown in Figure S4.

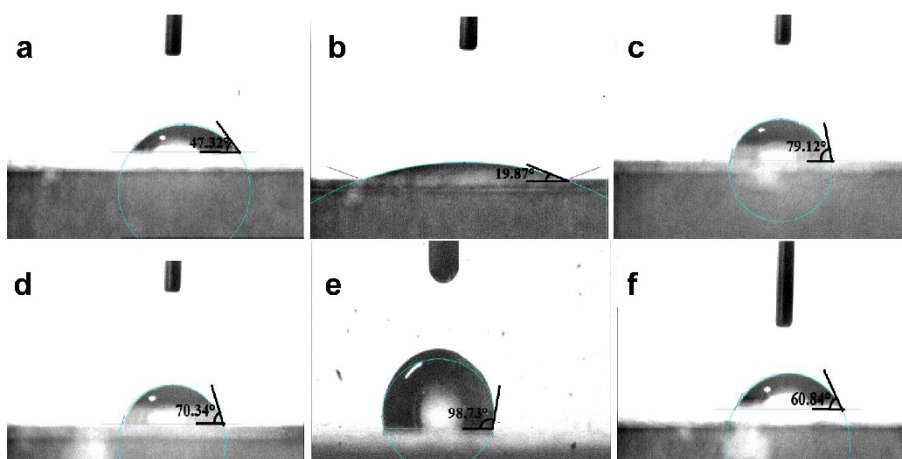

**Figure S4.** Contact angles of  $\mu$ -(*lhb*-POEGMA)(PSt-N<sub>3</sub>)<sub>2</sub> films from THF (a:  $CA_w$ , d:  $CA_o$ ), methanol (b:  $CA_w$ , e:  $CA_o$ ) and cyclohexane (c:  $CA_w$ , f:  $CA_o$ )

Camera images of different  $\mu$ -(*lhb*-POEGMA)(*lhb*-PSt) films are shown in Figure S5.

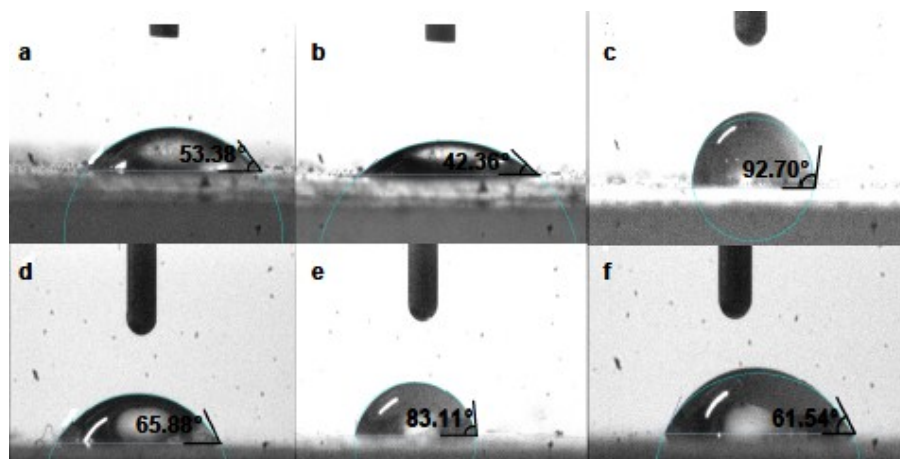

**Figure S5.** Contact angles of  $\mu$ -(*lhb*-POEGMA)(*lhb*-PSt) films casting from different solvents THF (a:  $CA_w$ , d:  $CA_o$ ), methanol (b:  $CA_w$ , e:  $CA_o$ ) and cyclohexane (c:  $CA_w$ , f:  $CA_o$ )

**Table S1.** Contact angles of different copolymer films cast from different solvents

| sample                                                                          | THF    |        | CH <sub>3</sub> OH |        | cyclohexane |        |
|---------------------------------------------------------------------------------|--------|--------|--------------------|--------|-------------|--------|
|                                                                                 | $CA_w$ | $CA_o$ | $CA_w$             | $CA_o$ | $CA_w$      | $CA_o$ |
| $\mu$ -(PSt-N <sub>3</sub> ) <sub>2</sub> (POEGMA-N <sub>3</sub> ) <sub>2</sub> | 50.0°  | 65.6°  | 39.8°              | 82.5°  | 89.5°       | 56.4°  |
| $\mu$ -( <i>lhb</i> -POEGMA)(PSt-N <sub>3</sub> ) <sub>2</sub>                  | 47.3°  | 70.3°  | 19.9°              | 98.7°  | 79.1°       | 60.8°  |
| $\mu$ -( <i>lhb</i> -POEGMA)( <i>lhb</i> -PSt)                                  | 53.4°  | 65.9°  | 42.4°              | 83.1°  | 92.7°       | 61.5°  |
